# Supplementary material for: Thermally stable energetic salts based on 3-nitramino-4-tetrazolefurazan
Source: Royal Society of Chemistry journal article supplement (doi:10.1039/c6ra12109h), 2016-01-01
Supplement: c6ra12109h1.pdf [file c6ra12109h1.pdf]

### 1. NMR Spectrum of the salts

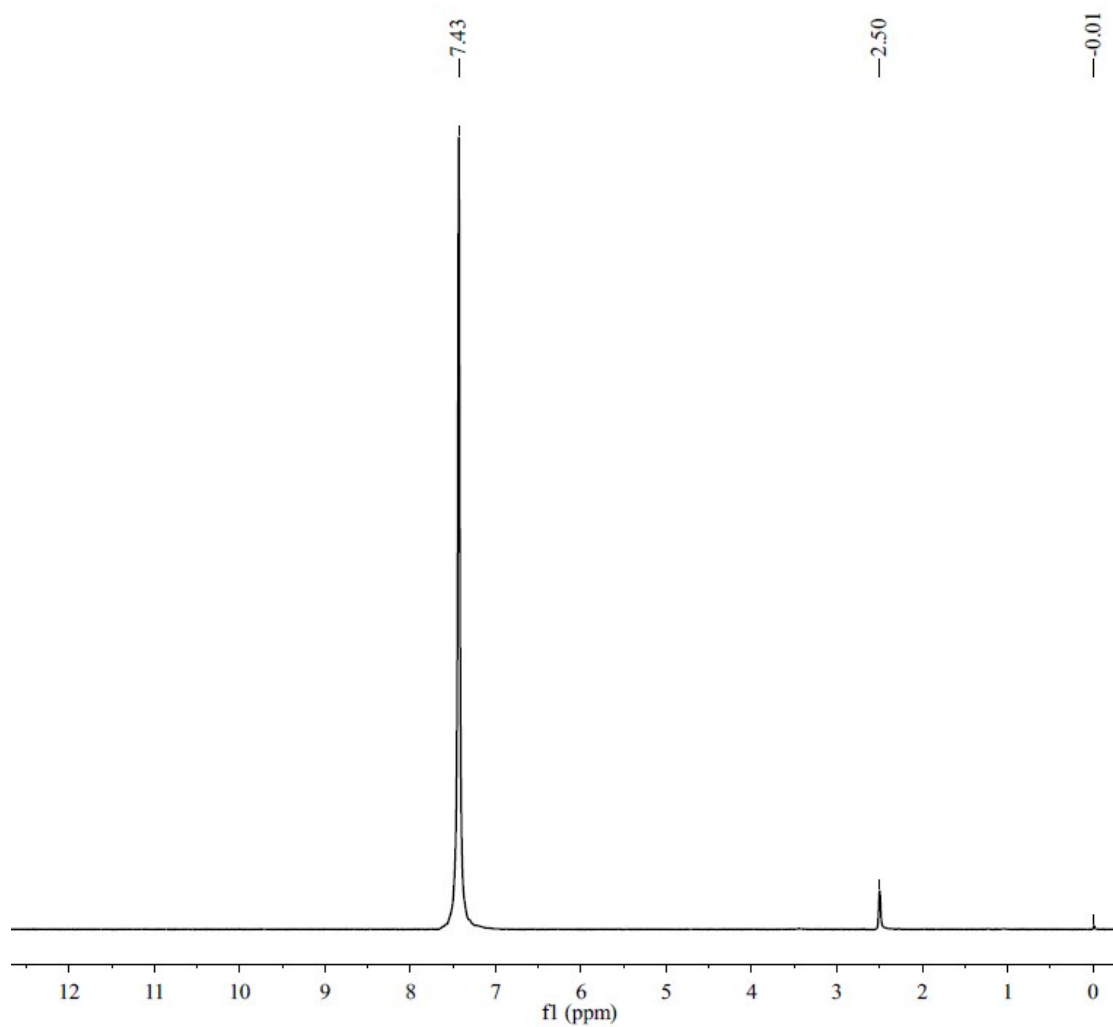

Figure S1. <sup>1</sup>H NMR spectrum of diammonium NATF (**2**)

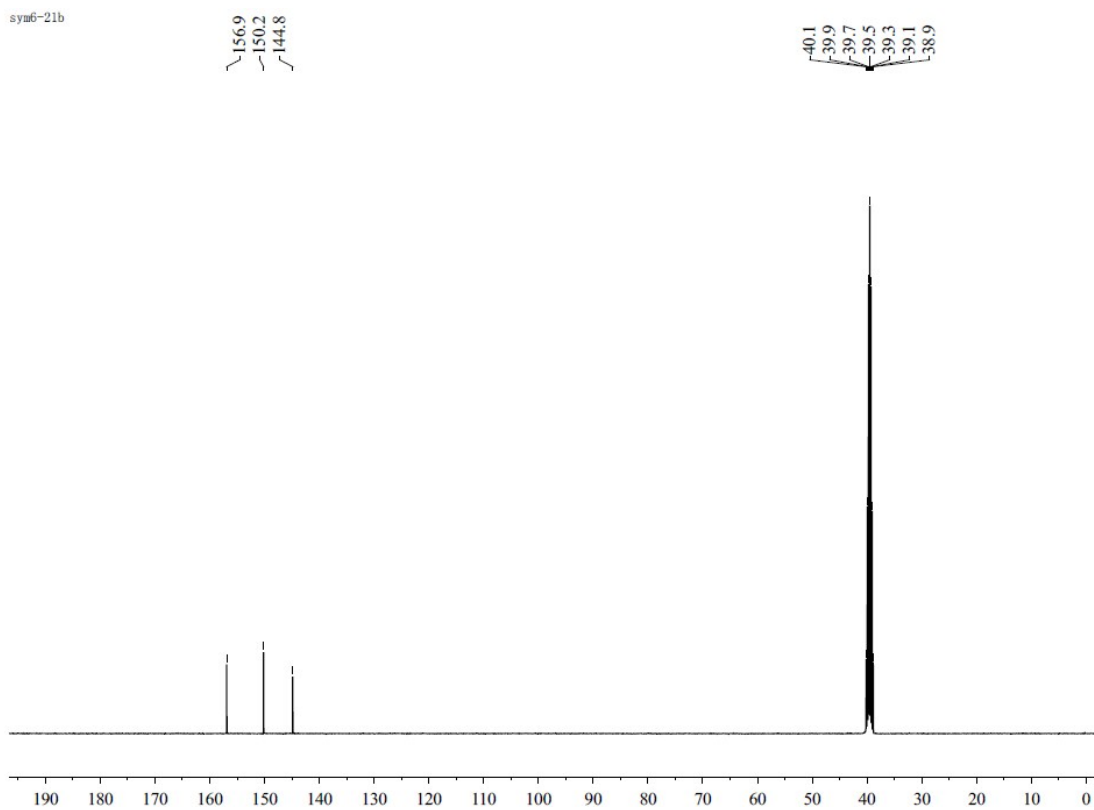

Figure S2. <sup>13</sup>C NMR spectrum of diammonium NATF (**2**)

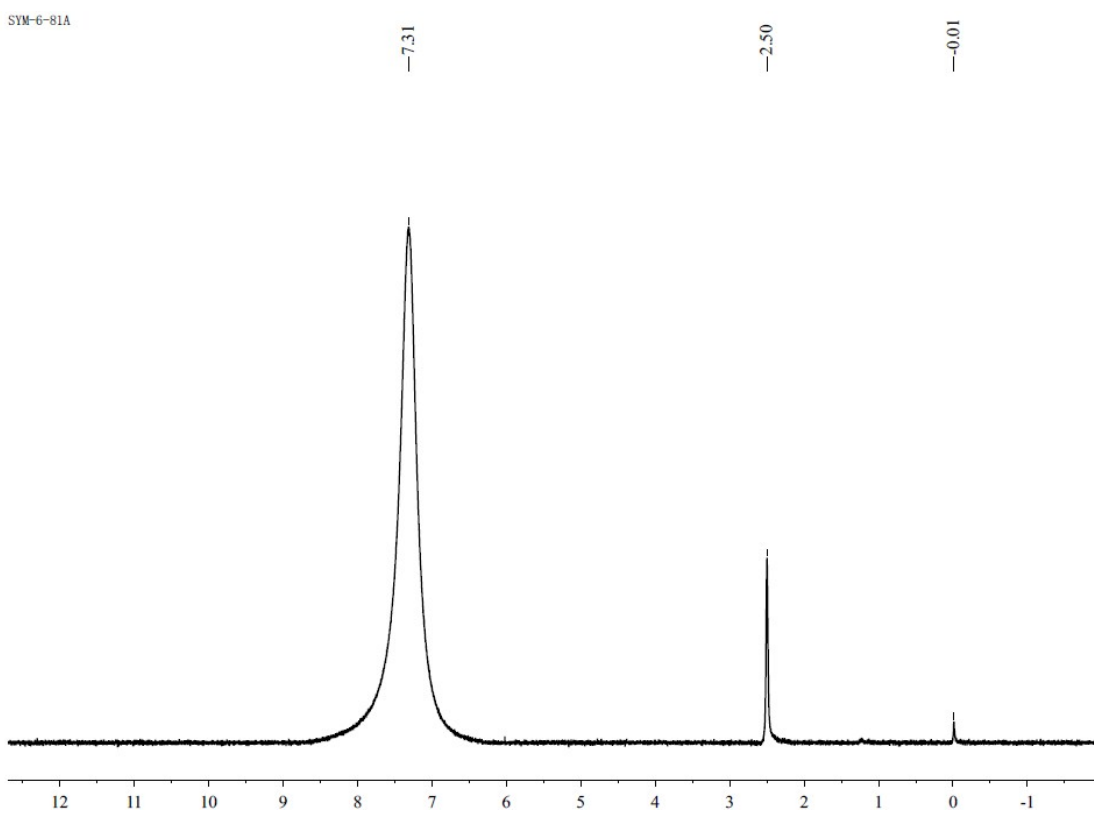

Figure S3. <sup>1</sup>H NMR spectrum of dihydrazinium NATF (**4**)

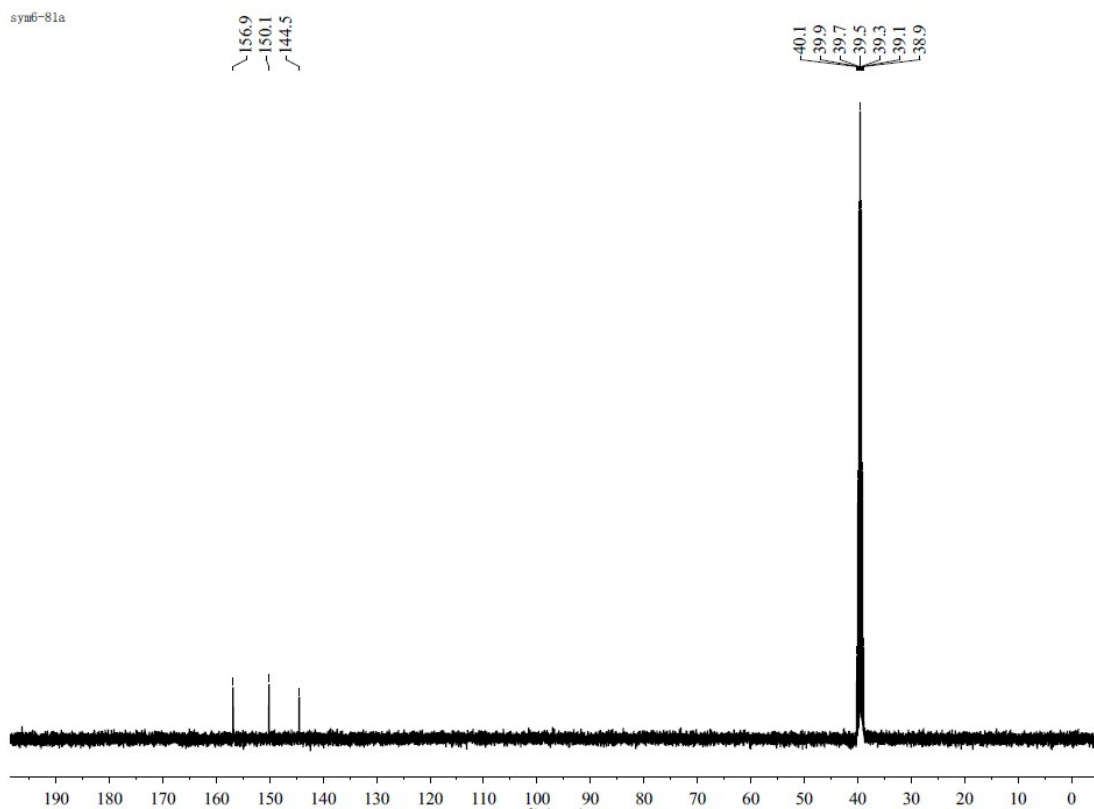

Figure S4.  $^{13}\text{C}$  NMR spectrum of dihydrazinium NATF (**4**)

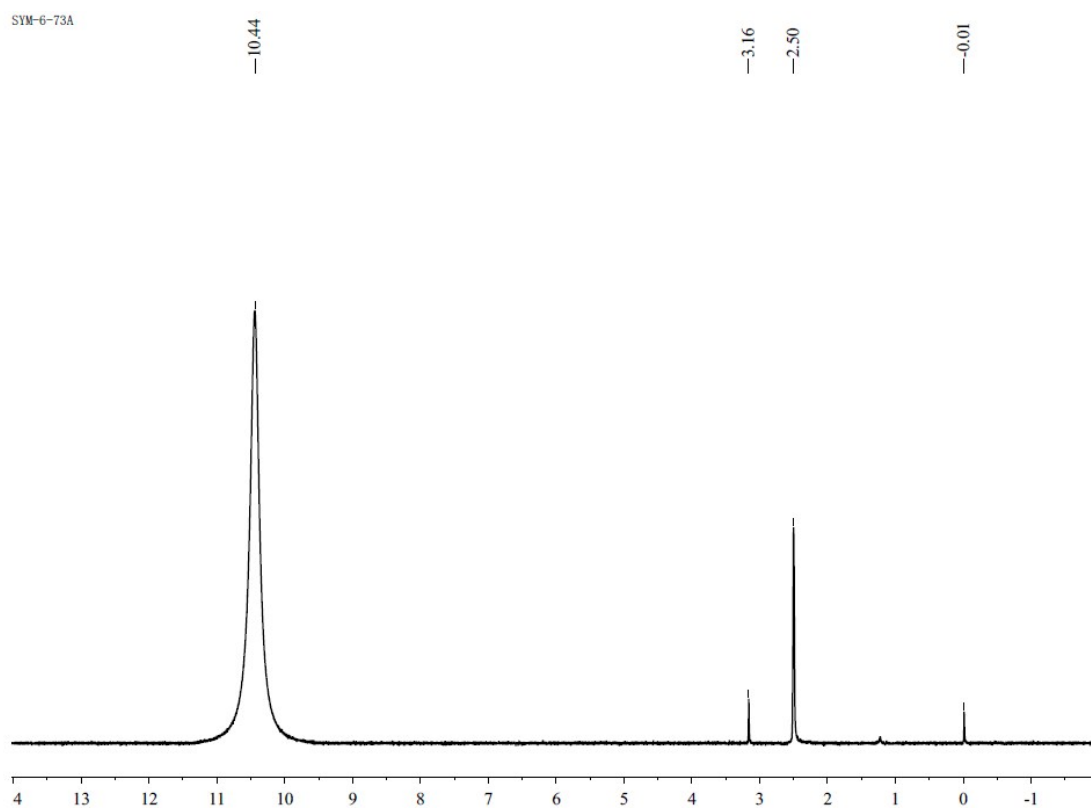

Figure S5.  $^1\text{H}$  NMR spectrum of dihydroxylammonium NATF (**5**)

sym6-73a

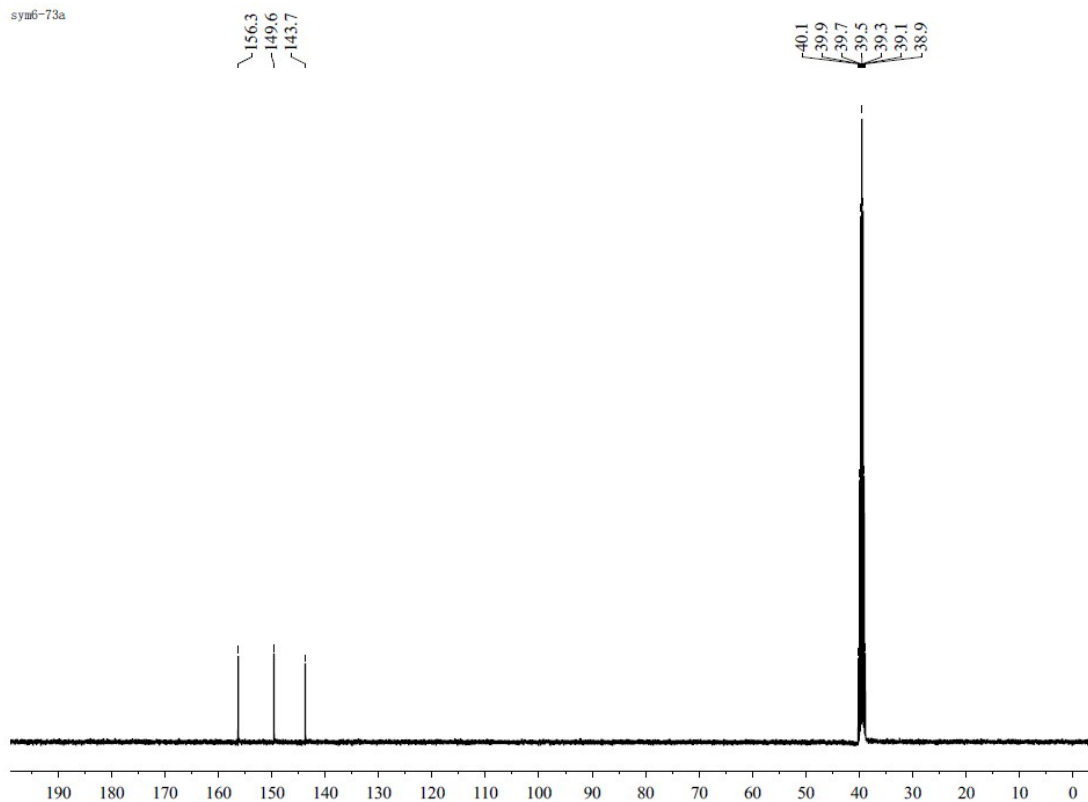

Figure S6.  $^{13}\text{C}$  NMR spectrum of dihydroxylammonium NATF (5)

SYM-6-81B

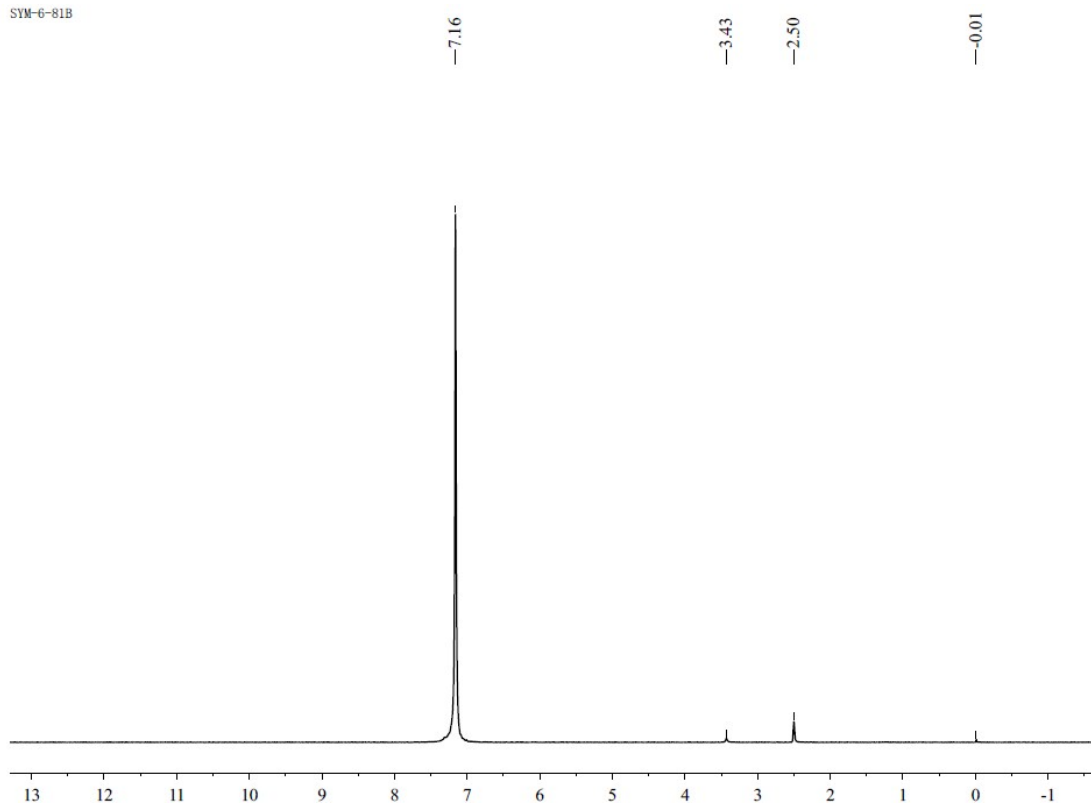

Figure S7.  $^1\text{H}$  NMR spectrum of bis(guanidinium) NATF (6)

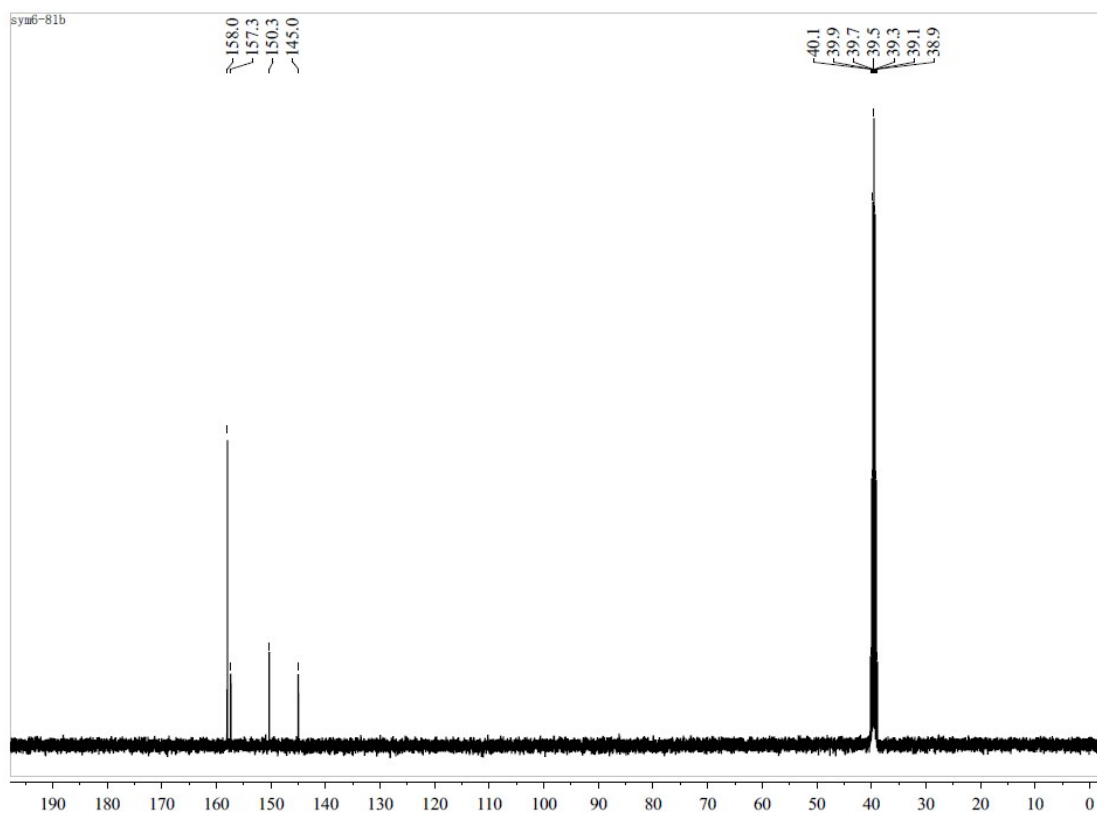

Figure S8.  $^{13}\text{C}$  NMR spectrum of bis(guanidinium) NATF (6)

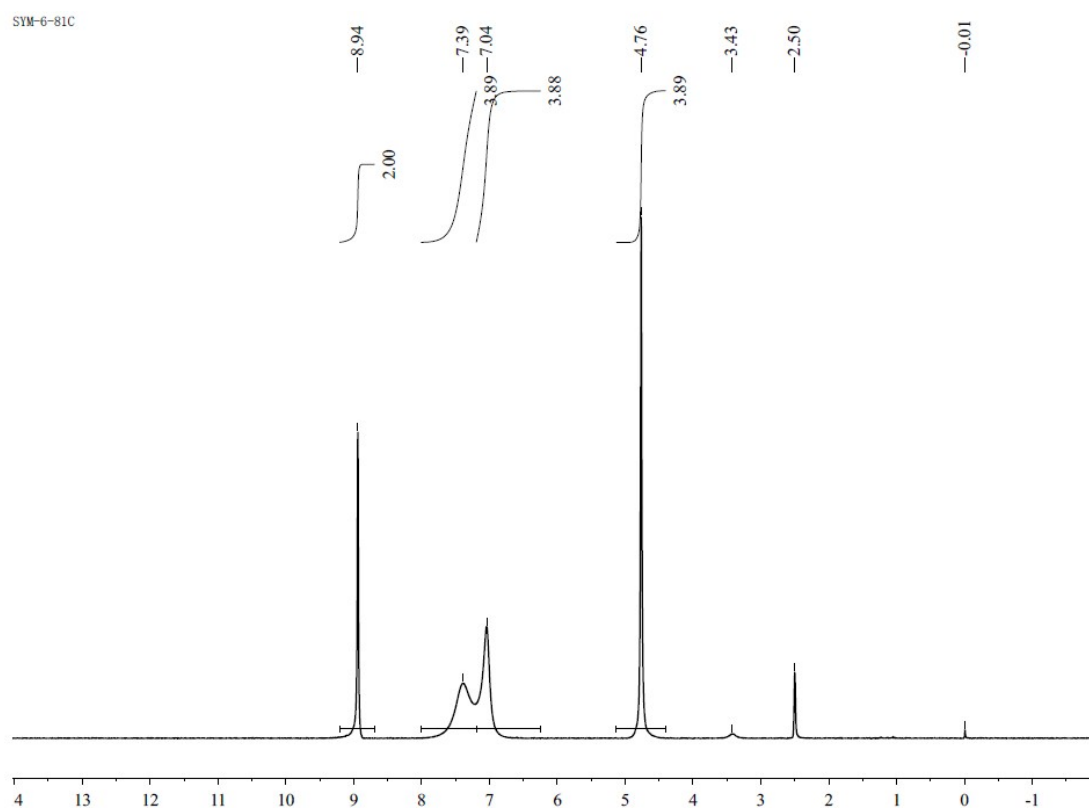

Figure S9.  $^1\text{H}$  NMR spectrum of bis(aminoguanidinium) NATF (7)

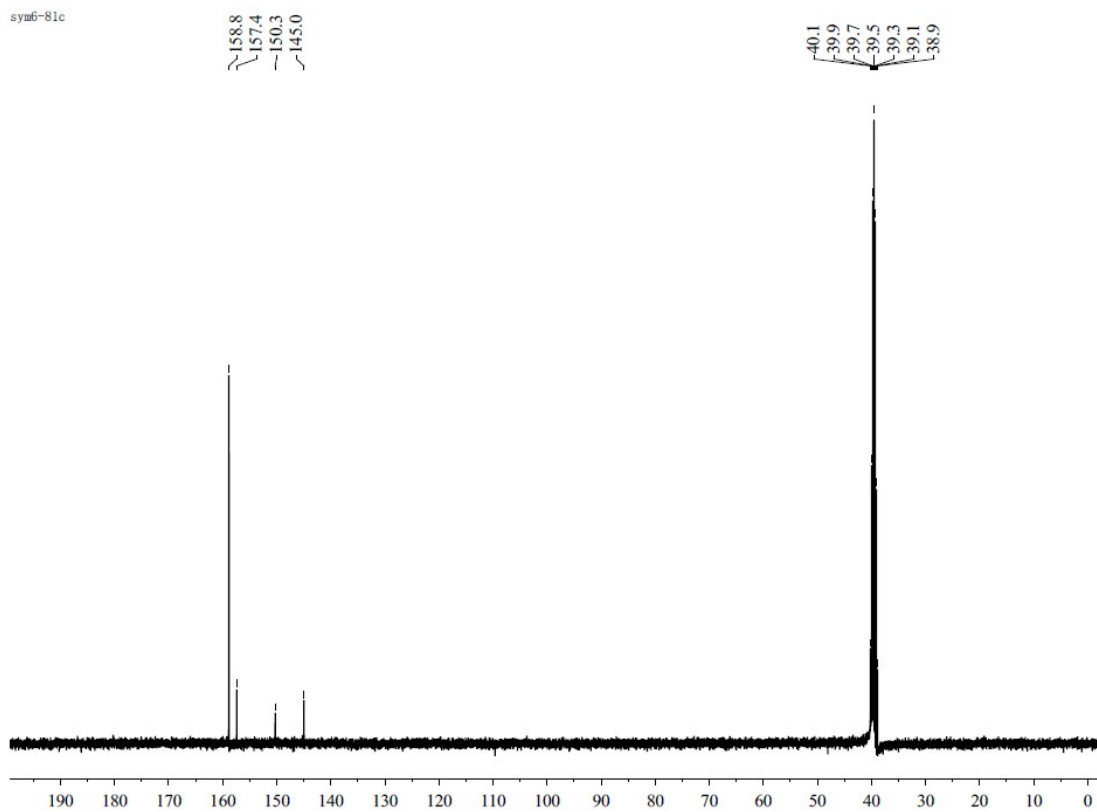

Figure S10.  $^{13}\text{C}$  NMR spectrum of bis(aminoguanidinium) NATF (**7**)

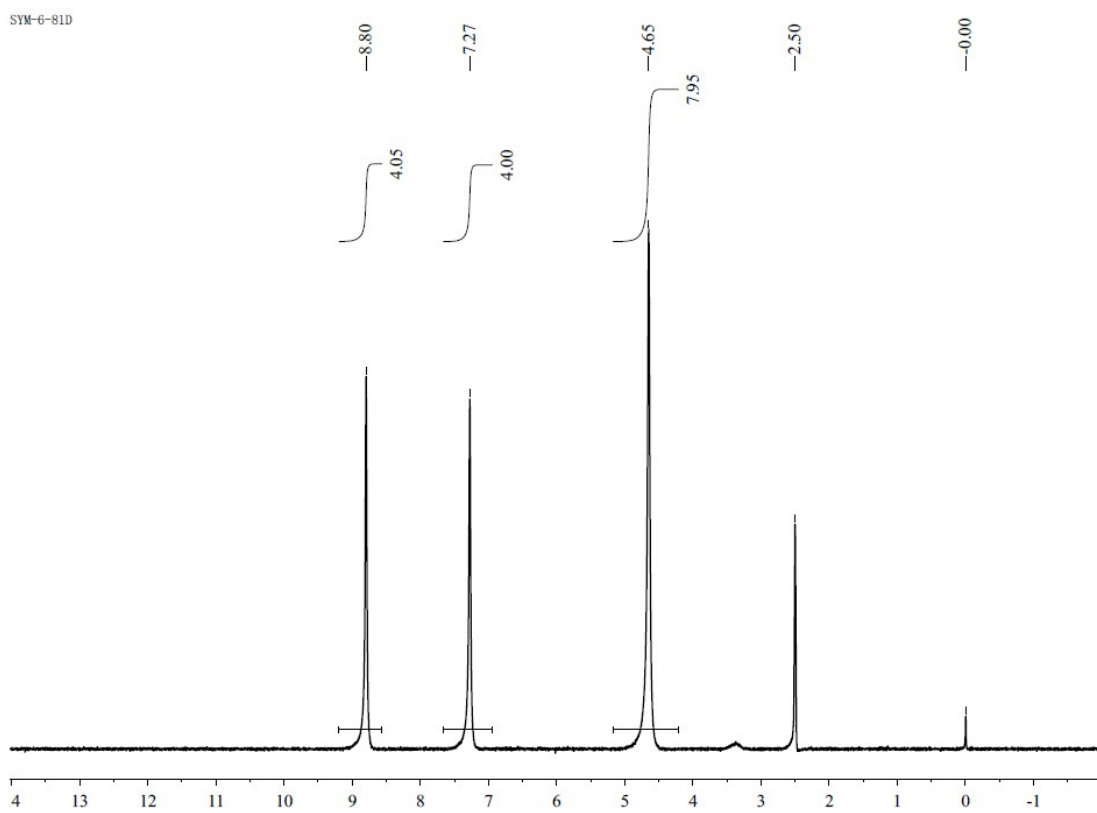

Figure S11.  $^1\text{H}$  NMR spectrum of bis(diaminoguanidinium) NATF (**8**)

sym6-81d

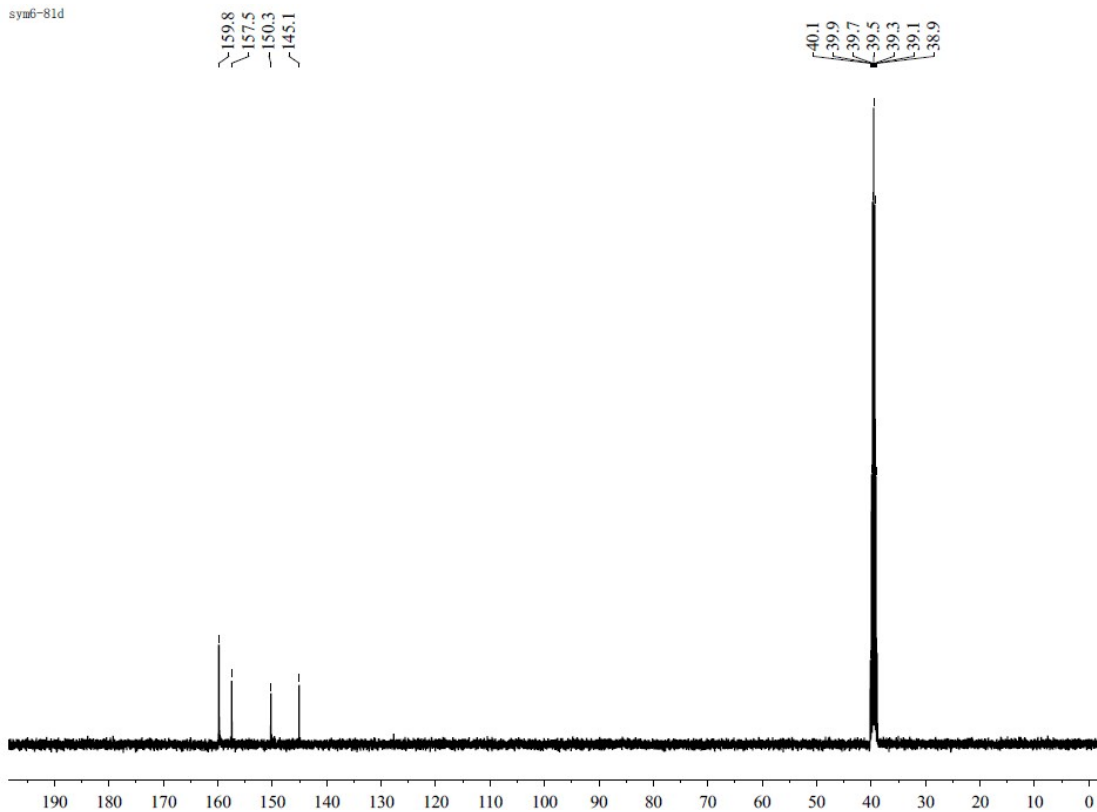

Figure S12.  $^{13}\text{C}$  NMR spectrum of bis(diaminoguanidinium) NATF (**8**)

SYM-6-81E

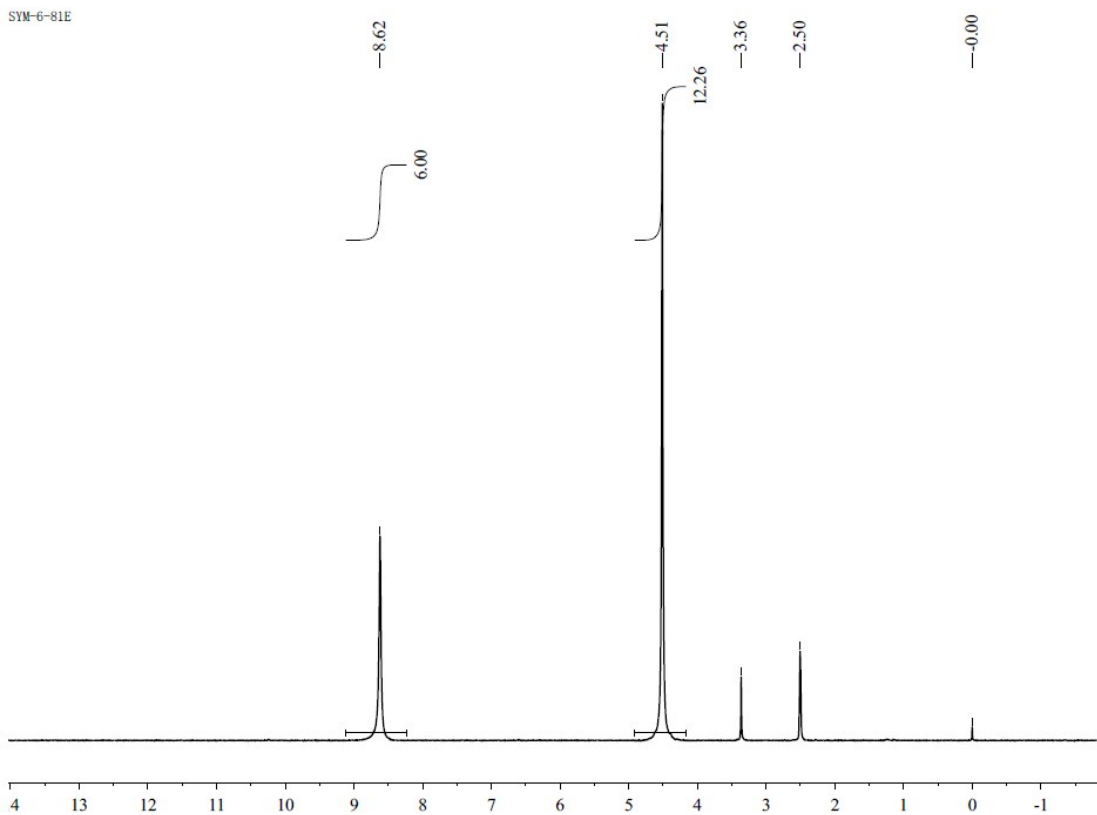

Figure S13.  $^1\text{H}$  NMR spectrum of bis(triaminoguanidinium) NATF (**9**)

sym6-81e

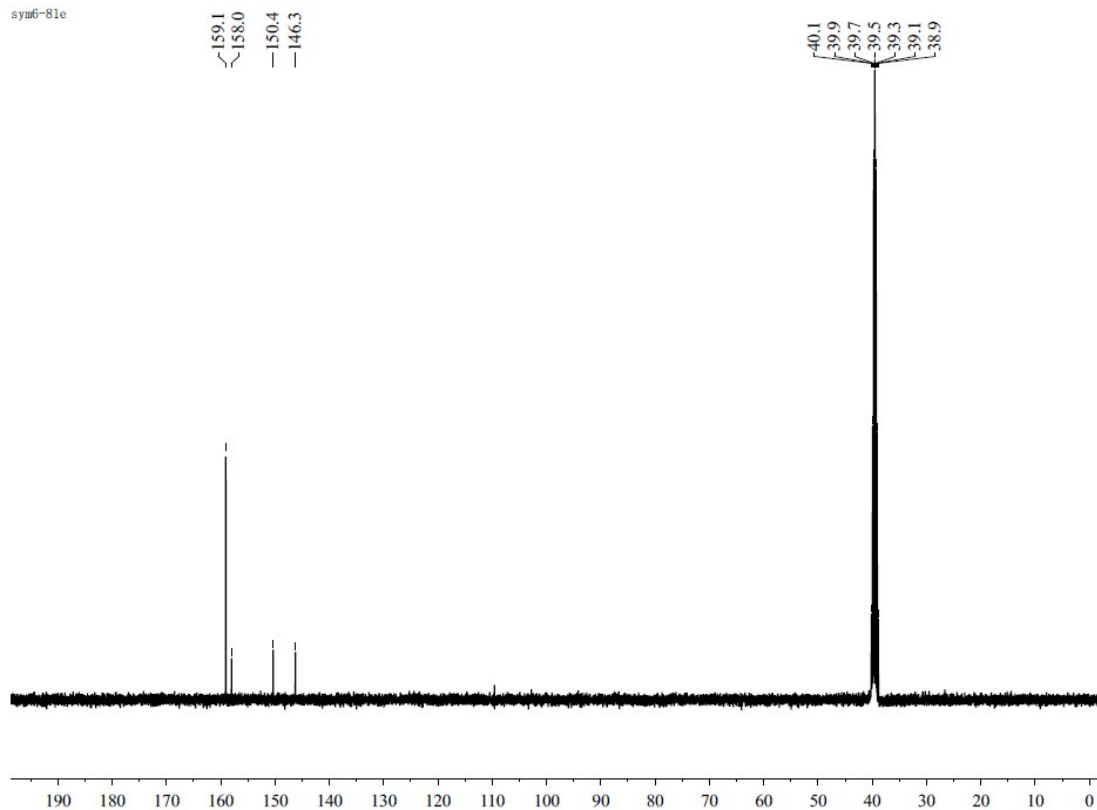Figure S14.  $^{13}\text{C}$  NMR spectrum of bis(triaminoguanidinium) NATF (**9**)

## 2. Crystallographic data

Table S1 Crystallographic data and structure refinement parameters for **5**<sup>[a]</sup>.

|                                  | <b>5</b>                                                |
|----------------------------------|---------------------------------------------------------|
| CCDC number                      | 1476973                                                 |
| Empirical formula                | $\text{C}_3\text{H}_8\text{N}_{10}\text{O}_5$           |
| <i>M</i> <sub>w</sub>            | 264.19                                                  |
| Crystal system                   | Triclinic                                               |
| Space group                      | P -1                                                    |
| <i>a</i> [Å]                     | 7.2173(13)                                              |
| <i>b</i> [Å]                     | 8.1190(14)                                              |
| <i>c</i> [Å]                     | 9.0665(16)                                              |
| $\alpha$ [°]                     | 84.202(3)                                               |
| $\beta$ [°]                      | 71.566(3)                                               |
| $\gamma$ [°]                     | 73.613(3)                                               |
| <i>V</i> [Å <sup>3</sup> ]       | 483.50(15)                                              |
| <i>Z</i>                         | 2                                                       |
| <i>T</i> [K]                     | 293(2)                                                  |
| $\lambda$ [Å]                    | 0.71073                                                 |
| Density[ $\text{mg m}^{-3}$ ]    | 1.815                                                   |
| $\mu$ [ $\text{mm}^{-1}$ ]       | 0.17                                                    |
| <i>F</i> (000)                   | 272                                                     |
| Crystal size[ $\text{mm}^{-3}$ ] | 0.21×0.17×0.11                                          |
| $\theta$ range[°]                | 2.368-25.999                                            |
| Index ranges                     | -4≤ <i>h</i> ≤8<br>-9≤ <i>k</i> ≤9<br>-10≤ <i>l</i> ≤11 |
| Reflections collected            | 2890                                                    |
| Independent reflections          | 1885 [R(int)=0.0152]                                    |



|                            |            |
|----------------------------|------------|
| Data/restraints/parameters | 1885/0/196 |
| GOF                        | 1.057      |
| $R[F^2 > 2\sigma(F^2)]$    | 0.0339     |
| $wR(F^2)^{[b]}$            | 0.0886     |

[a] These data can be obtained free of charge from The Cambridge Cry-tallographic Data Centre via [www.ccdc.cam.ac.uk/data\\_request/cif](http://www.ccdc.cam.ac.uk/data_request/cif).

[b]  $w = 1/[\sigma^2(F_o^2) + (0.0473P)^2 + 0.3662P]$ , where  $P = (F_o^2 + 2F_c^2)/3$

Table S2. Atomic coordinates ( $\times 10^4$ ) and equivalent isotropic displacement parameters ( $\text{\AA}^2 \times 10^3$ ) for salt **5**.  $U(\text{eq})$  is defined as one third of the trace of the orthogonalized  $U^{ij}$  tensor.

|       | x       | y        | z       | U(eq) |
|-------|---------|----------|---------|-------|
| N(1)  | 1186(2) | -625(2)  | 6396(1) | 25(1) |
| N(2)  | 2211(2) | 151(2)   | 5226(1) | 27(1) |
| N(3)  | 884(2)  | 2901(2)  | 6571(2) | 31(1) |
| N(4)  | 2673(2) | 4375(2)  | 4639(2) | 32(1) |
| N(5)  | 5469(2) | 3293(2)  | 1694(1) | 29(1) |
| N(6)  | 6651(2) | 2318(2)  | 468(2)  | 32(1) |
| N(7)  | 6401(2) | 769(2)   | 718(2)  | 33(1) |
| N(8)  | 5051(2) | 686(2)   | 2115(1) | 31(1) |
| N(9)  | 6268(2) | 2481(2)  | 7234(2) | 29(1) |
| N(10) | 824(2)  | 2594(2)  | -54(2)  | 32(1) |
| O(1)  | 1297(2) | 4475(1)  | 6089(1) | 35(1) |
| O(2)  | 1421(2) | -2203(1) | 6195(1) | 35(1) |
| O(3)  | 46(2)   | 62(1)    | 7648(1) | 36(1) |
| O(4)  | 4342(2) | 3559(2)  | 7872(2) | 43(1) |
| O(5)  | 410(2)  | 3670(2)  | 1186(1) | 43(1) |
| C(1)  | 1996(2) | 1865(2)  | 5413(2) | 24(1) |
| C(2)  | 3109(2) | 2804(2)  | 4202(2) | 24(1) |
| C(3)  | 4517(2) | 2253(2)  | 2683(2) | 24(1) |

Table S3. Bond lengths [ $\text{\AA}$ ] and angles [ $^\circ$ ] for salt **5**.

---

|                |            |
|----------------|------------|
| N(1)-O(3)      | 1.2468(16) |
| N(1)-O(2)      | 1.2683(16) |
| N(1)-N(2)      | 1.3039(17) |
| N(2)-C(1)      | 1.3776(18) |
| N(3)-C(1)      | 1.3110(18) |
| N(3)-O(1)      | 1.3902(17) |
| N(4)-C(2)      | 1.2962(19) |
| N(4)-O(1)      | 1.3683(17) |
| N(5)-C(3)      | 1.3316(19) |
| N(5)-N(6)      | 1.3367(17) |
| N(6)-N(7)      | 1.3077(18) |
| N(7)-N(8)      | 1.3408(18) |
| N(8)-C(3)      | 1.3274(18) |
| N(9)-O(4)      | 1.3934(17) |
| N(9)-H(9A)     | 0.93(2)    |
| N(9)-H(9B)     | 0.86(2)    |
| N(9)-H(9C)     | 0.89(2)    |
| N(10)-O(5)     | 1.3990(17) |
| N(10)-H(10A)   | 0.91(2)    |
| N(10)-H(10B)   | 0.90(3)    |
| N(10)-H(10C)   | 0.94(2)    |
| O(4)-H(4)      | 0.83(3)    |
| O(5)-H(5)      | 0.87(3)    |
| C(1)-C(2)      | 1.432(2)   |
| C(2)-C(3)      | 1.454(2)   |
| O(3)-N(1)-O(2) | 119.80(12) |
| O(3)-N(1)-N(2) | 125.18(12) |
| O(2)-N(1)-N(2) | 115.03(11) |
| N(1)-N(2)-C(1) | 116.42(12) |
| C(1)-N(3)-O(1) | 104.85(11) |
| C(2)-N(4)-O(1) | 106.00(12) |
| C(3)-N(5)-N(6) | 104.91(12) |
| N(7)-N(6)-N(5) | 109.19(12) |
| N(6)-N(7)-N(8) | 109.74(12) |
| C(3)-N(8)-N(7) | 104.50(12) |

|                     |            |
|---------------------|------------|
| O(4)-N(9)-H(9A)     | 106.9(12)  |
| O(4)-N(9)-H(9B)     | 111.3(15)  |
| H(9A)-N(9)-H(9B)    | 114(2)     |
| O(4)-N(9)-H(9C)     | 105.2(13)  |
| H(9A)-N(9)-H(9C)    | 107.3(18)  |
| H(9B)-N(9)-H(9C)    | 112(2)     |
| O(5)-N(10)-H(10A)   | 113.0(14)  |
| O(5)-N(10)-H(10B)   | 107.7(16)  |
| H(10A)-N(10)-H(10B) | 108(2)     |
| O(5)-N(10)-H(10C)   | 107.2(13)  |
| H(10A)-N(10)-H(10C) | 109.4(19)  |
| H(10B)-N(10)-H(10C) | 111(2)     |
| N(4)-O(1)-N(3)      | 111.30(10) |
| N(9)-O(4)-H(4)      | 104.8(16)  |
| N(10)-O(5)-H(5)     | 102.7(16)  |
| N(3)-C(1)-N(2)      | 131.13(13) |
| N(3)-C(1)-C(2)      | 108.78(12) |
| N(2)-C(1)-C(2)      | 120.09(12) |
| N(4)-C(2)-C(1)      | 109.07(13) |
| N(4)-C(2)-C(3)      | 120.67(13) |
| C(1)-C(2)-C(3)      | 130.26(13) |
| N(8)-C(3)-N(5)      | 111.66(13) |
| N(8)-C(3)-C(2)      | 125.60(13) |
| N(5)-C(3)-C(2)      | 122.73(13) |

---

Table S4. Anisotropic displacement parameters ( $\text{\AA}^2 \times 10^3$ ) for salt **5**.

The anisotropic displacement factor exponent takes the form:  $-2p^2[ h^2 a^* U^{11} + \dots + 2 h k a^* b^* U^{12} ]$

|       | U <sup>11</sup> | U <sup>22</sup> | U <sup>33</sup> | U <sup>23</sup> | U <sup>13</sup> | U <sup>12</sup> |
|-------|-----------------|-----------------|-----------------|-----------------|-----------------|-----------------|
| N(1)  | 30(1)           | 22(1)           | 21(1)           | 1(1)            | -5(1)           | -8(1)           |
| N(2)  | 35(1)           | 22(1)           | 21(1)           | -1(1)           | 0(1)            | -11(1)          |
| N(3)  | 40(1)           | 24(1)           | 24(1)           | -3(1)           | 0(1)            | -12(1)          |
| N(4)  | 40(1)           | 24(1)           | 25(1)           | -4(1)           | 1(1)            | -11(1)          |
| N(5)  | 32(1)           | 25(1)           | 26(1)           | -2(1)           | 1(1)            | -10(1)          |
| N(6)  | 34(1)           | 31(1)           | 26(1)           | -2(1)           | 1(1)            | -10(1)          |
| N(7)  | 37(1)           | 30(1)           | 26(1)           | -6(1)           | 2(1)            | -11(1)          |
| N(8)  | 36(1)           | 26(1)           | 25(1)           | -4(1)           | 1(1)            | -11(1)          |
| N(9)  | 31(1)           | 25(1)           | 27(1)           | -1(1)           | -2(1)           | -8(1)           |
| N(10) | 38(1)           | 27(1)           | 25(1)           | -2(1)           | 1(1)            | -11(1)          |
| O(1)  | 49(1)           | 23(1)           | 26(1)           | -7(1)           | 3(1)            | -12(1)          |
| O(2)  | 51(1)           | 21(1)           | 30(1)           | 0(1)            | -3(1)           | -14(1)          |
| O(3)  | 42(1)           | 31(1)           | 24(1)           | -3(1)           | 6(1)            | -10(1)          |
| O(4)  | 29(1)           | 25(1)           | 65(1)           | -9(1)           | 4(1)            | -9(1)           |
| O(5)  | 71(1)           | 33(1)           | 24(1)           | -2(1)           | -2(1)           | -24(1)          |
| C(1)  | 27(1)           | 23(1)           | 20(1)           | -2(1)           | -4(1)           | -8(1)           |
| C(2)  | 28(1)           | 23(1)           | 23(1)           | -1(1)           | -6(1)           | -8(1)           |
| C(3)  | 27(1)           | 23(1)           | 21(1)           | -1(1)           | -5(1)           | -9(1)           |

Table S5. Hydrogen coordinates ( $\times 10^4$ ) and isotropic displacement parameters ( $\text{\AA}^2 \times 10^{-3}$ ) for salt **5**.

|        | x        | y        | z        | U(eq) |
|--------|----------|----------|----------|-------|
| H(4)   | 4540(30) | 4510(30) | 7950(30) | 59(6) |
| H(5)   | -120(40) | 3090(30) | 1990(30) | 64(7) |
| H(9A)  | 7000(30) | 2450(30) | 7920(20) | 49(6) |
| H(10A) | 1530(30) | 1500(30) | 90(30)   | 56(6) |
| H(9B)  | 6830(30) | 2810(30) | 6310(30) | 59(6) |
| H(10B) | 1560(40) | 3040(30) | -910(30) | 79(8) |
| H(9C)  | 6080(30) | 1440(30) | 7250(20) | 49(6) |
| H(10C) | -430(40) | 2580(30) | -150(30) | 59(6) |

Table S6. Torsion angles [°] for salt **5**.

---

|                     |             |
|---------------------|-------------|
| O(3)-N(1)-N(2)-C(1) | 0.0(2)      |
| O(2)-N(1)-N(2)-C(1) | -179.62(12) |
| C(3)-N(5)-N(6)-N(7) | 0.28(16)    |
| N(5)-N(6)-N(7)-N(8) | -0.07(17)   |
| N(6)-N(7)-N(8)-C(3) | -0.17(16)   |
| C(2)-N(4)-O(1)-N(3) | 0.65(16)    |
| C(1)-N(3)-O(1)-N(4) | -0.44(16)   |
| O(1)-N(3)-C(1)-N(2) | -179.91(14) |
| O(1)-N(3)-C(1)-C(2) | 0.07(16)    |
| N(1)-N(2)-C(1)-N(3) | -1.7(2)     |
| N(1)-N(2)-C(1)-C(2) | 178.34(12)  |
| O(1)-N(4)-C(2)-C(1) | -0.59(16)   |
| O(1)-N(4)-C(2)-C(3) | 178.82(12)  |
| N(3)-C(1)-C(2)-N(4) | 0.34(18)    |
| N(2)-C(1)-C(2)-N(4) | -179.69(13) |
| N(3)-C(1)-C(2)-C(3) | -178.99(14) |
| N(2)-C(1)-C(2)-C(3) | 1.0(2)      |
| N(7)-N(8)-C(3)-N(5) | 0.35(17)    |
| N(7)-N(8)-C(3)-C(2) | -178.34(13) |
| N(6)-N(5)-C(3)-N(8) | -0.40(17)   |
| N(6)-N(5)-C(3)-C(2) | 178.34(13)  |
| N(4)-C(2)-C(3)-N(8) | -179.27(14) |
| C(1)-C(2)-C(3)-N(8) | 0.0(2)      |
| N(4)-C(2)-C(3)-N(5) | 2.2(2)      |
| C(1)-C(2)-C(3)-N(5) | -178.56(14) |

---

Table S7. Hydrogen bonds for salt **5** [ $\text{\AA}$  and  $^\circ$ ].

| D-H...A               | d(D-H)  | d(H...A) | d(D...A)   | $\angle(\text{DHA})$ |
|-----------------------|---------|----------|------------|----------------------|
| N(10)-H(10C)...N(6)#1 | 0.94(2) | 2.07(2)  | 2.967(2)   | 159.2(19)            |
| N(9)-H(9C)...N(8)#2   | 0.89(2) | 2.07(2)  | 2.930(2)   | 162.7(19)            |
| N(9)-H(9C)...N(2)#2   | 0.89(2) | 2.48(2)  | 2.9724(18) | 115.2(16)            |
| N(10)-H(10B)...O(4)#3 | 0.90(3) | 2.10(3)  | 2.8986(19) | 148(2)               |
| N(10)-H(10B)...N(3)#3 | 0.90(3) | 2.50(2)  | 3.032(2)   | 118(2)               |
| N(9)-H(9B)...O(2)#2   | 0.86(2) | 2.24(2)  | 3.0238(18) | 150(2)               |
| N(9)-H(9B)...N(4)#4   | 0.86(2) | 2.44(2)  | 3.0638(19) | 129.6(19)            |
| N(10)-H(10A)...O(3)#5 | 0.91(2) | 2.44(2)  | 2.9576(19) | 116.7(17)            |
| N(10)-H(10A)...N(7)#6 | 0.91(2) | 2.05(2)  | 2.883(2)   | 152(2)               |
| N(9)-H(9A)...O(3)#7   | 0.93(2) | 2.45(2)  | 2.9847(19) | 116.4(15)            |
| N(9)-H(9A)...N(6)#8   | 0.93(2) | 2.24(2)  | 3.018(2)   | 141.0(17)            |
| O(5)-H(5)...O(3)#5    | 0.87(3) | 2.53(3)  | 3.1783(17) | 131.9(19)            |
| O(5)-H(5)...O(2)#5    | 0.87(3) | 1.81(3)  | 2.6715(16) | 171(2)               |
| O(5)-H(5)...N(1)#5    | 0.87(3) | 2.51(3)  | 3.3407(17) | 160(2)               |
| O(4)-H(4)...N(5)#4    | 0.83(3) | 1.85(3)  | 2.6721(18) | 171(2)               |
| O(4)-H(4)...N(5)#4    | 0.83(3) | 1.85(3)  | 2.6721(18) | 171(2)               |
| O(5)-H(5)...N(1)#5    | 0.87(3) | 2.51(3)  | 3.3407(17) | 160(2)               |
| O(5)-H(5)...O(2)#5    | 0.87(3) | 1.81(3)  | 2.6715(16) | 171(2)               |
| O(5)-H(5)...O(3)#5    | 0.87(3) | 2.53(3)  | 3.1783(17) | 131.9(19)            |
| N(9)-H(9A)...N(6)#8   | 0.93(2) | 2.24(2)  | 3.018(2)   | 141.0(17)            |
| N(9)-H(9A)...O(3)#7   | 0.93(2) | 2.45(2)  | 2.9847(19) | 116.4(15)            |
| N(10)-H(10A)...N(7)#6 | 0.91(2) | 2.05(2)  | 2.883(2)   | 152(2)               |
| N(10)-H(10A)...O(3)#5 | 0.91(2) | 2.44(2)  | 2.9576(19) | 116.7(17)            |
| N(9)-H(9B)...N(4)#4   | 0.86(2) | 2.44(2)  | 3.0638(19) | 129.6(19)            |
| N(9)-H(9B)...O(2)#2   | 0.86(2) | 2.24(2)  | 3.0238(18) | 150(2)               |
| N(10)-H(10B)...N(3)#3 | 0.90(3) | 2.50(2)  | 3.032(2)   | 118(2)               |
| N(10)-H(10B)...O(4)#3 | 0.90(3) | 2.10(3)  | 2.8986(19) | 148(2)               |
| N(9)-H(9C)...N(2)#2   | 0.89(2) | 2.48(2)  | 2.9724(18) | 115.2(16)            |
| N(9)-H(9C)...N(8)#2   | 0.89(2) | 2.07(2)  | 2.930(2)   | 162.7(19)            |
| N(10)-H(10C)...N(6)#1 | 0.94(2) | 2.07(2)  | 2.967(2)   | 159.2(19)            |

Symmetry transformations used to generate equivalent atoms:

#1  $x-1, y, z$     #2  $-x+1, -y, -z+1$     #3  $x, y, z-1$     #4  $-x+1, -y+1, -z+1$   
#5  $-x, -y, -z+1$     #6  $-x+1, -y, -z$     #7  $x+1, y, z$     #8  $x, y, z+1$

### 3. Ab Initio computational data

Table S8 Ab Initio computational data

| Compounds                                                                          | $E_0$<br>(Hartree) | ZPE<br>(Hartree) | $H_T$<br>(Hartree) | HOF<br>(kJ/mol)       |
|------------------------------------------------------------------------------------|--------------------|------------------|--------------------|-----------------------|
|   | -261.532452        | 0.045697         | 0.004418           | 196.75 <sup>[i]</sup> |
| CH <sub>4</sub>                                                                    | -40.3984857        | 0.044793         | 0.003812           | -74.6 <sup>[ii]</sup> |
| NH <sub>3</sub>                                                                    | -56.4341763        | 0.034372         | 0.003818           | -45.9 <sup>[2]</sup>  |
| CH <sub>3</sub> NH <sub>2</sub>                                                    | -95.6318759        | 0.064032         | 0.004369           | -23.0 <sup>[2]</sup>  |
| NH <sub>2</sub> NO <sub>2</sub>                                                    | -260.5478787       | 0.039257         | 0.003356           | -6.1 <sup>[iii]</sup> |
| Tetrazole                                                                          | -257.7256749       | 0.046855         | 0.00443            | 333.2 <sup>[iv]</sup> |
|   | -777.48901         | 0.092337         | 0.011604           | 635.04                |
|  | -776.3585889       | 0.065737         | 0.011197           | 472.1                 |

<sup>a</sup> Total energy ( $E_0$ ) calculated by B3LYP/6-31+G\*\*/MP2/6-311++G\*\* method (Hartree/Particle);

<sup>b</sup> Zero-point correction (ZPE) (Hartree/Particle); <sup>c</sup> Values of thermal correction ( $H_T$ ) (Hartree/Particle); <sup>d</sup> Heat of formation (HOT) (kJ/mol).

Calculations were carried out by using the Gaussian 09 (Revision E.01) suite of programs.<sup>[4]</sup> The geometric optimization of the structures and frequency analyses were carried out by using the B3LYP functional with the 6-31+G\*\* basis set, and single-point energies were calculated at the MP2(full)/6-311++G\*\* level. All of the optimized structures were characterized to be true local energy minima on the potential-energy surface without imaginary frequencies.

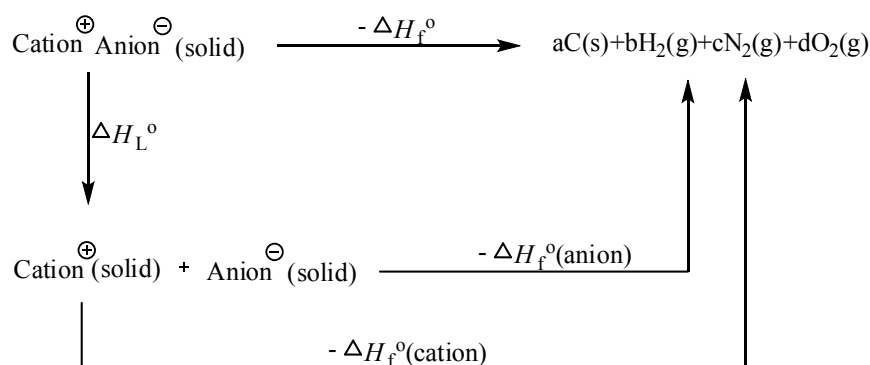

Figure S15. Born-Haber cycle for the formation for energetic salts

Based on the Born-Haber energy cycle (Figure 5), the heat of formation of a salt can be simplified according to Equation (1), where  $\Delta H_L$  is the lattice energy of the salt.

$$\Delta H_f^{\circ}(\text{ionic salt}, 298\text{K}) = \Delta H_f^{\circ}(\text{cation}, 298\text{K}) + \Delta H_f^{\circ}(\text{anion}, 298\text{K}) - \Delta H_L \quad (1)$$

The  $\Delta H_L$  value could be predicted by the formula suggested by Jenkins et al [Eq. (2)],<sup>[5]</sup> where



$U_{\text{POT}}$  is the lattice potential energy and  $nM$  and  $nX$  depend on the nature of the ions  $M^{p+}$  and  $X^{q-}$ , respectively, and are equal to three for monoatomic ions, five for linear polyatomic ions, and six for nonlinear polyatomic ions.

$$\Delta H_L = U_{\text{POT}} + [p(n_M/2-2) + q(n_X/2-2)]RT \quad (2)$$

The equation for the lattice potential energy,  $U_{\text{POT}}$ , takes the form of Equation (3), where  $\rho_m$  is the density ( $\text{g cm}^{-3}$ ),  $M_m$  is the chemical formula mass of the ionic material ( $\text{g}$ ), and the coefficients  $\gamma$  ( $\text{kJ}^{-1}\text{mol}^{-1}\text{cm}$ ) and  $\delta$  ( $\text{kJ}^{-1}\text{mol}^{-1}$ ) are assigned literature values. [5]

$$U_{\text{POT}} (\text{kJ}^{-1}\text{mol}^{-1}) = \gamma (\rho_m/M_m)^{1/3} + \delta \quad (3)$$

#### 4. Detonation performances calculation

Detonation pressure ( $P$ ) and detonation velocity ( $D$ ) were calculated according to the Kamlet-Jacobs equations<sup>[v]</sup>.

$$D = 1.01(N \bar{M}^{1/2} Q^{1/2})^{1/2}(1 + 1.30\rho) \quad (4)$$

$$P = 1.558\rho^2 \bar{M}^{1/2} Q^{1/2} \quad (5)$$

where each term in eqs 4 and 5 is defined as follows:  $D$ , the detonation velocity ( $\text{km s}^{-1}$ );  $P$ , the detonation pressure (GPa);  $N$ , the moles of detonation gases per gram explosive;  $\bar{M}$ , the average molecular weight of these gases ( $\text{g mol}^{-1}$ );  $Q$ , the heat of detonation ( $\text{J g}^{-1}$ ); and  $\rho$ , the loaded density of explosives ( $\text{g cm}^{-3}$ ). The measured density was used for the calculation here.

#### Ref:

- 
- i Wang R, Guo Y, Zeng Z, et al. *Chem. Eur. J.*, 2009, 15, 2625-2634.
  - ii *Eur. J. Inorg. Chem.*, 2008, 2560-2568.
  - iii Wang K, Parrish D A, Shreeve J M. *Chem. Eur. J.*, 2011, 17, 14485-14492.
  - iv W. Zhu, C. Zhang, T. Wei, H. Xiao, *Struct. Chem.*, 2011, 22, 149-159.
  - v (a) M. J. Kamlet, S. J. Jacobs, *J. Chem. Phys.* **1968**, 48, 23-35; (b) M. J. Kamlet, J. E. Ablard, *J. Chem. Phys.* **1968**, 48, 36-42; (c) M. J. Kamlet, C. Dicknison, *J. Chem. Phys.* **1968**, 48, 43-49. (d) H. Gao, C. Ye, C. Piekarski, J. M. Shreeve, *J. Phys. Chem. C* **2007**, 111, 10718-10731.
